# Supplementary material for: Intelligent acoustofluidics enabled mini-bioreactors for human brain organoids
Source: Royal Society of Chemistry journal article supplement (doi:10.1039/d1lc00145k), 2021-01-01
Supplement: d1lc00145k2.pdf [file d1lc00145k2.pdf]

## Supplementary Information

### Intelligent Acoustofluidics Enabled Mini-bioreactors for Human Brain Organoids

*Hongwei Cai,<sup>1</sup> Zheng Ao,<sup>1</sup> Zhu hao Wu,<sup>1</sup> Sunghwa Song,<sup>1</sup> Ken Mackie,<sup>2</sup> and Feng Guo,<sup>1,\*</sup>*

1. Department of Intelligent Systems Engineering, Indiana University, Bloomington, IN 47405, United States
2. Gill Center for Biomolecular Science, and Department of Psychological and Brain Sciences, Indiana University, Bloomington, IN 47405, United States

\*Corresponding email: [fengguo@iu.edu](mailto:fengguo@iu.edu)

#### Supporting statement:

#### Supporting Figures:

**Figure S1.** Acoustic spiral phase device and simulation domain.

#### Supporting Movie:

**Movie S1.** Rotation under a sudden weight load.

#### Supporting Tables:

**Table S1.** Antibody for immunofluorescence staining

**Table S2.** Primer sequences for qPCR analysis

### Supporting statement (Acoustic vortex field simulation and torque calculation):

A simulation model was developed to account for the acoustic vortex field bypass the acoustic spiral phase plate (ASPP). The simulation was conducted using the finite element package COMSOL 5.2a (COMSOL group). The model domain established for the numerical simulation is shown in **Figure S1a**. The background medium is defined as the water with a mass density of 1000 kg/m<sup>3</sup> and sound speed of 1490 m/s, while the ASPP is defined as 3D printed materials (PLA) with a mass density of 1190 kg/m<sup>3</sup> and sound speed of 2200 m/s. To simplify the simulation and reduce the computational cost, we only considered longitudinal sound waves vibrating along the normal direction of the ASPP. The “Pressure Acoustic” physics module was used to solve the acoustic pressure and phase-field distribution. The plane wave radiation boundary condition and incident waves condition was imposed on the incident boundary to introduce acoustic waves and absorb the reflected waves. The sound hard boundary condition was assumed on the side boundaries of the cylindrical water domain. To ensure the simulation accuracy, one-tenth of the acoustic wavelength in water was set to be the maximum mesh element size, the meshes were further refined in the ASPP units.

As the ASPP converts plane incident waves to an acoustic vortex field, a torque also applies to the ASPP and drives the ASPP to rotate. The torque applied to the ASPP can be described following basic continuum mechanics, including acoustic absorption by the ASPP and the reflected acoustic field by the ASPP spiral surface. The acoustic radiation stress along the ASPP surface exert the torque. In the case of an ideal ASPP (**Figure S1b**), the torque can be written as:

$$f(r, \phi) \propto \frac{I(r)}{c_2} [(1 + R(r)) \cos^2 \beta(r) - \frac{c_2}{c_1} T(r) \cos^2 \gamma(r)] n_{2 \rightarrow 1}$$

where  $\gamma = \arcsin[(c_1/c_2) \sin \beta]$  is the refraction angle,  $\beta = \arctan[l\varepsilon/(2\pi r)]$  is the local inclination angle with respect to the spiral axis,  $l$  an integer for the topological charge,

$\varepsilon = \frac{1}{f(c_1^{-1} - c_2^{-1})}$ ,  $I(r)$  is the local acoustic intensity of the incident acoustic waves,  $T = (4Z_1/Z_2)/(Z_1/Z_2 + \cos \gamma / \cos \beta)^2$  represents the transmittance,  $Z_i = \rho_i c_i$  the acoustic impedances of water ( $i = 1$ ) and PLA ( $i = 2$ ),  $\rho$  is the mass density,  $R = 1 - \cos \gamma / \cos \beta$   $T$  is the reflectance. The total torque  $\Gamma$  applied to the ASPP can be calculated by integrating the torque

$$\Gamma = \int_0^{2\pi} \int_0^R r u_r \times f r dr d\phi$$

density among the ASPP ramp surface cylindrical coordinate system. , where  $(u_r, u_\phi, u_z)$  refers to the

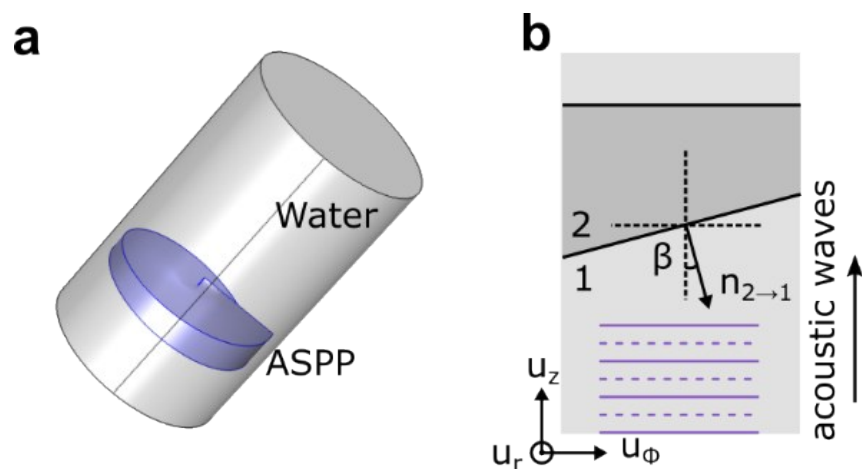

**Figure S1.** Acoustic field simulation domain and torque calculation. (a) Simulation domain of the acoustic spiral phase plate, the blue part is the ASPP with topological charge  $l = 1$ . (b) Local representative schematic of incident waves transmission and reflection.

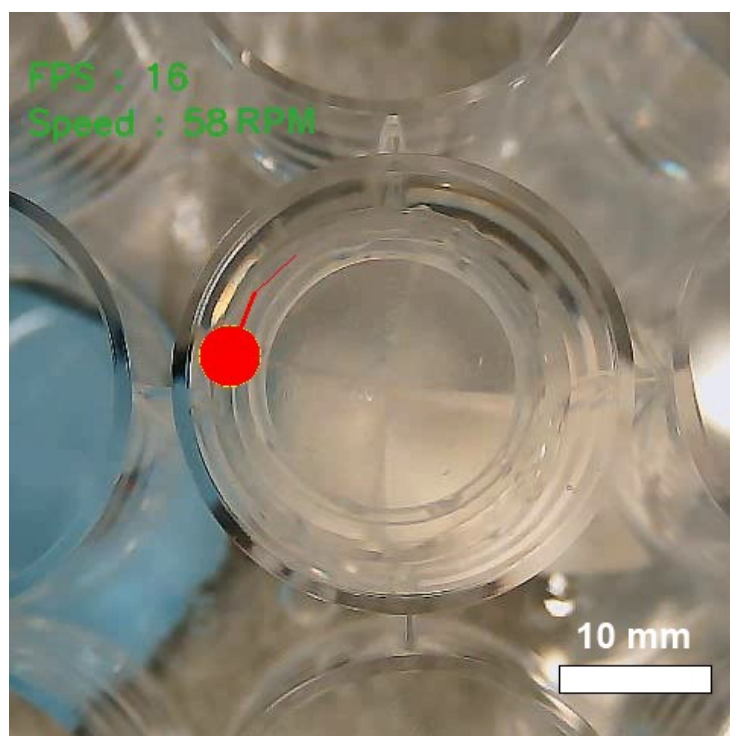

**Movie S1.** Rotational stability under sudden weight load disturbance (corresponding to Figure 4d). The movie is in real-time. (Scale bar: 500  $\mu\text{m}$ ).

**Table S1.** Antibody for immunofluorescence staining

| Antigen | Host    | Vendor    | Catalog# | Dilution |
|---------|---------|-----------|----------|----------|
| Pax6    | Rabbit  | Biolegend | 901301   | 1:500    |
| Map2    | Chicken | Millipore | AB5543   | 1:500    |

**Table S2.** Primer sequences for qPCR analysis

| Gene          | Primer sequence                   |
|---------------|-----------------------------------|
| PAX6 Fwd      | AGT TCT TCG CAA CCT GGC TA        |
| PAX6 Rev      | ATT CTC TCC CCC TCC TTC CT        |
| TBR1 Fwd      | GAC TCA GTT CAT CGC CGT CA        |
| TBR1 Rev      | TCG TGT CAT AAT TAT CCC GAA ATC C |
| CTIP2 Fwd     | CAG AGC AGC AAG CTC ACG           |
| CTIP2 Rev     | GGT GCT GTA GAC GCT GAA GG        |
| NKX2.1 Fwd    | GGA GGG AGC TGG GGA GAG G         |
| NKX2.1 Rev    | ATT TTC GCG GAG GGC GGT CG        |
| OTX-2 Fwd     | TTA AAA TCT CTG CCA TGG AAA       |
| OTX-2 Rev     | AGA ACA AAA ACC CGT GCC TT        |
| En2 Fwd       | GAA CCC GAA CAA AGA GGA CA        |
| En2 Rev       | CGC TTG TTC TGG AAC CAA AT        |
| Brachyury Fwd | CCC GTC TCC TTC AGC AAA GTC       |
| Brachyury Rev | TGG ATT CGA GGC TCA TAC TTA TGC   |
| SOX17 Fwd     | AGA TGC TGG GCA AGT CGT           |
| SOX17 Rev     | GCT TCA GCC GCT TCA CC            |
